# Supplementary material for: Geography of current and future global mammal extinction risk
Source: PubMed Central journal article supplement (PMC5690607; doi:10.1371/journal.pone.0186934), 2017-11-16

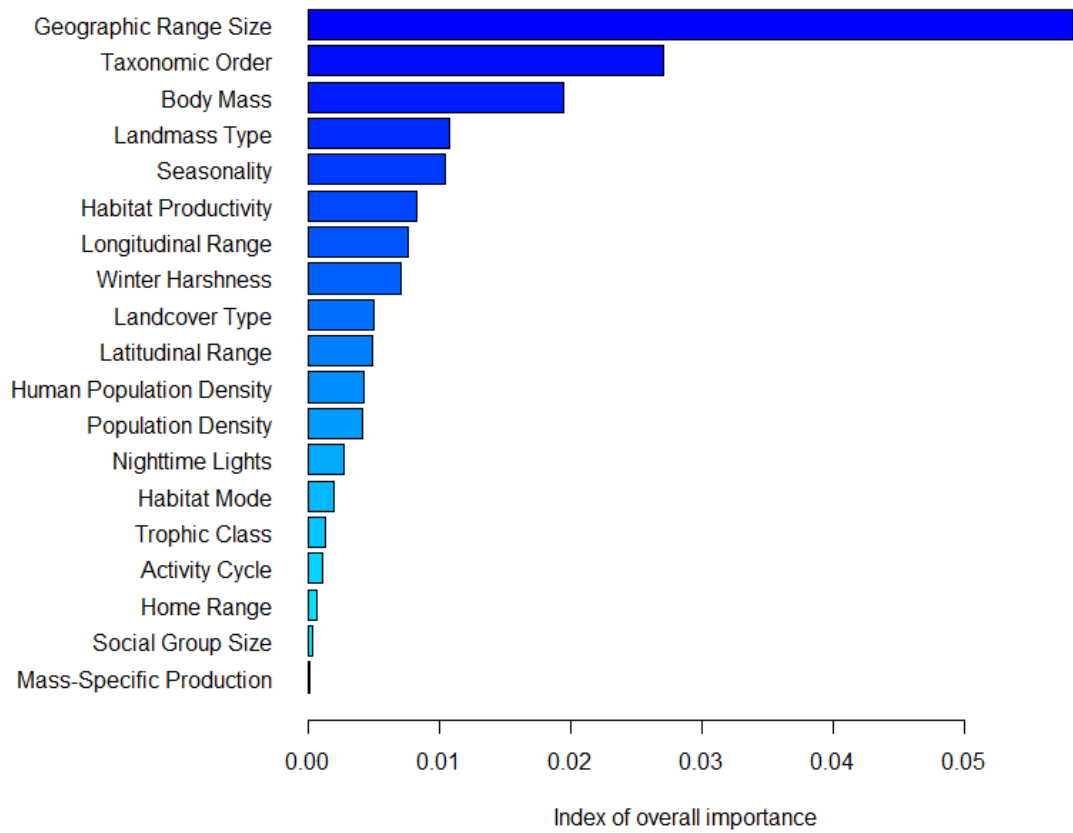

Supplement: pone.0186934.s002.pdf [file pone.0186934.s002.pdf]
